# Supplementary material
Source: PubMed Central journal article supplement (PMC3890795)
Supplement: 1319000111_pnas.201319000SI.pdf [file 1319000111_pnas.201319000SI.pdf]

# Supporting Information

Patrick et al. 10.1073/pnas.1319000111

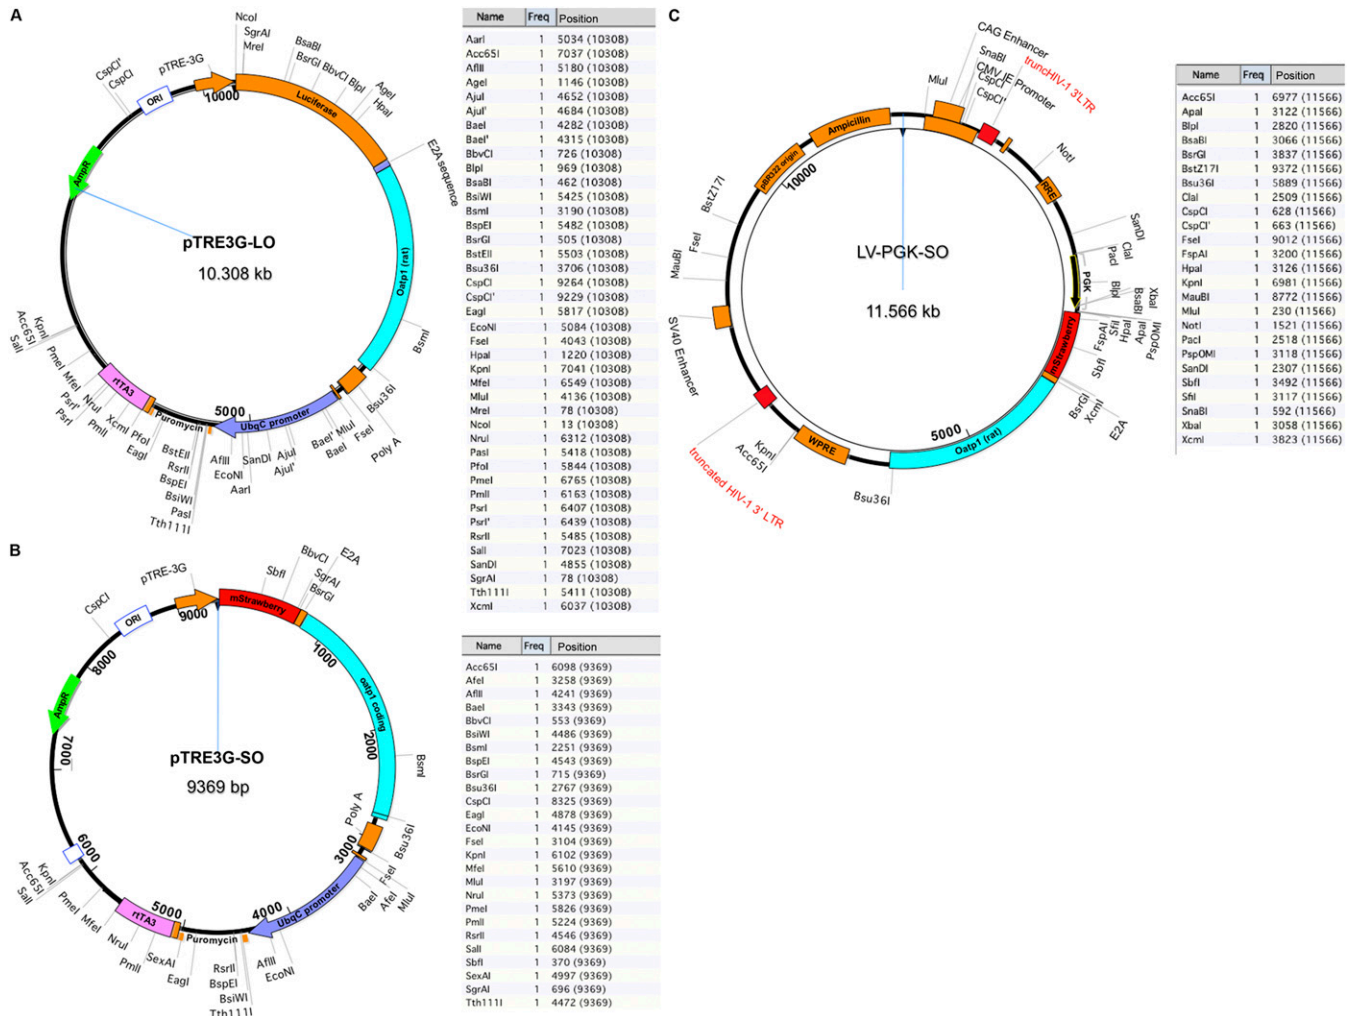

**Fig. S1.** Plasmid maps for the vectors used in this study. (A) Doxycycline-inducible luciferase–E2A–Oatp1. (B) Doxycycline-inducible mStrawberry–E2A–Oatp1. (C) Lentiviral-packaging plasmid pBOBI with constitutive PGK (phosphoglycerate kinase) promoter and mStrawberry–E2A–Oatp1 coding sequence.

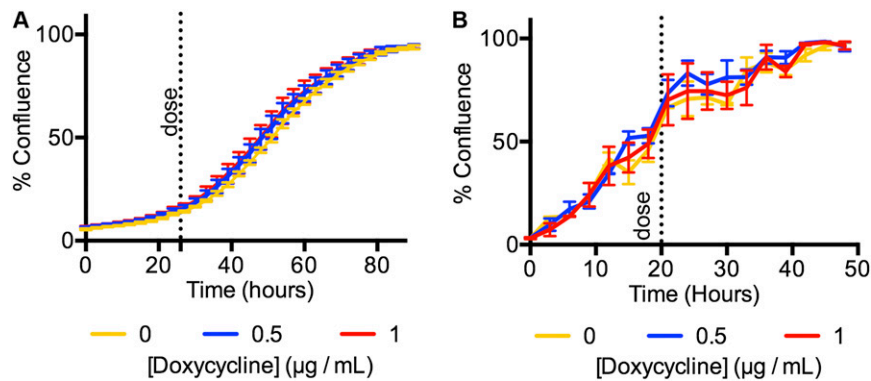

**Fig. 52.** Viability was not reduced by Oatp1 expression. (A) Clonal HEK 293T and (B) HCT 116 cells carrying the luciferase–E2A–Oatp1 transgene, regulated by a TRE3G doxycycline-inducible promoter, were induced at the indicated time (vertical dotted line) with the indicated concentration of doxycycline. Growth was assessed by measuring the degree of confluence on the plate (Incucyte, Essen Bioscience), with three replicate wells read per condition and nine fields of view per well. Error bars show SEM.

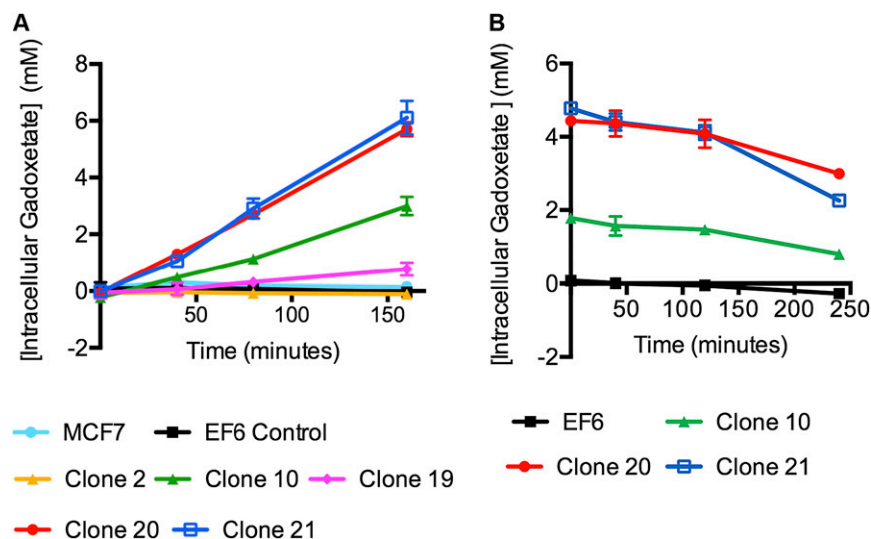

**Fig. 53.** Gadolinium-ethoxybenzyl-diethylenetriamine pentaacetic acid (Gd-EOB-DTPA) uptake and washout in MCF-7 cells transfected to express Oatp1. Measurements of uptake (A) and washout (B) in untransfected MCF-7 cells, in MCF-7 cells stably transfected with the empty vector (EF6) and in MCF-7 cells stably transfected with a vector expressing Oatp1a1. For uptake measurements, cells were incubated with 5 mM Gd-EOB-DTPA for the indicated times in transport buffer at 37 °C. For the efflux measurements, cells were preloaded by incubation with 5 mM Gd-EOB-DTPA for 120 min. They were then washed twice with ice-cold transport buffer and incubated in this buffer at 37 °C. The  $Gd^{3+}$ -chelate concentration was measured in cell lysates using an inversion recovery  $T_1$  measurement and assuming a molar relaxivity for the chelate of  $5.7 \text{ mM}^{-1}\cdot\text{s}^{-1}$ . The intracellular concentration was calculated by assuming that 120 mg of protein corresponds to 0.64 mL intracellular water (1). The points represent the average of three independent experiments (with each sample measured in triplicate) for uptake and two independent experiments for washout.

1. Reitzer LJ, Wice BM, Kennell D (1979) Evidence that glutamine, not sugar, is the major energy source for cultured HeLa cells. *J Biol Chem* 254(8):2669–2676.







Table S1. Cont.

| Gene reporter | Substrate                                                             | Contrast type                         | Fold contrast                                      | Promoter | Vector                        | Tissue type                         | Refs. |
|---------------|-----------------------------------------------------------------------|---------------------------------------|----------------------------------------------------|----------|-------------------------------|-------------------------------------|-------|
| mbGlucBiotin  | <sup>111</sup> In-DTPA-biotin, coelenterazine, magnetic nanoparticles | T <sub>2</sub> , PET, bioluminescence | Twofold increase in R <sub>2</sub> in vivo         | CMV      | Lentivirus (polyclonal cells) | Gli36 glioma cells                  | (22)  |
| DMT1          | Manganese chloride                                                    | T <sub>1</sub>                        | 1.6 to 1.8-fold R <sub>1</sub> enhancement in vivo | CAG      | Plasmid/lentiviral            | HEK, B16, GL26, neonate mouse brain | (23)  |
| HSV-TK        | 5-methyl-5,6-dihydrothymidine                                         | CEST                                  | Change of 2% in signal                             | CMV      | Lentivirus                    | 9L glioma                           | (24)  |

CAG, cytomagalovirus- $\beta$ -actin- $\beta$ -globin; CEST, chemical exchange saturation transfer; DMT1, divalent metal ion transporter; MIONs, monocrySTALLINE iron oxide nanoparticles; MNPs, magnetic nanoparticles; N/A, not applicable; PET, positron emission tomography.

\*Measurement of a specific type of relaxation that differs from R<sub>2</sub>.

- Koretsky AP, Brosnan MJ, Chen LH, Chen JD, Van Dyke T (1990) NMR detection of creatine kinase expressed in liver of transgenic mice: Determination of free ADP levels. *Proc Natl Acad Sci USA* 87(8):3112–3116.
- Auricchio A, Zhou R, Wilson JM, Glickson JD (2001) In vivo detection of gene expression in liver by <sup>31</sup>P nuclear magnetic resonance spectroscopy employing creatine kinase as a marker gene. *Proc Natl Acad Sci USA* 98(9):5205–5210.
- Weissleder R, et al. (1997) MR imaging and scintigraphy of gene expression through melanin induction. *Radiology* 204(2):425–429.
- Alifke H, et al. (2003) In vitro MR imaging of regulated gene expression. *Radiology* 228(2):488–492.
- Moore A, Josephson L, Bhorade RM, Basilion JP, Weissleder R (2001) Human transferrin receptor gene as a marker gene for MR imaging. *Radiology* 221(1):244–250.
- Louie AY, et al. (2000) In vivo visualization of gene expression using magnetic resonance imaging. *Nat Biotechnol* 18(3):321–325.
- Kodibagkar VD, Yu J, Liu L, Hetherington HP, Mason RP (2006) Imaging beta-galactosidase activity using <sup>19</sup>F chemical shift: imaging of LacZ gene-reporter molecule 2-fluoro-4-nitrophenol-beta-D-galactopyranoside. *Magn Reson Imaging* 24(7):959–962.
- Liu L, Kodibagkar VD, Yu JX, Mason RP (2007) <sup>19</sup>F-NMR detection of lacZ gene expression via the enzymic hydrolysis of 2-fluoro-4-nitrophenyl beta-D-galactopyranoside in vivo in PC3 prostate tumor xenografts in the mouse. *FASEB J* 21(9):2014–2019.
- Yu JX, Kodibagkar VD, Hallac RR, Liu L, Mason RP (2012) Dual <sup>19</sup>F/<sup>1</sup>H MR gene reporter molecules for in vivo detection of  $\beta$ -galactosidase. *Bioconjug Chem* 23(3):596–603.
- Cui W, Liu L, Kodibagkar VD, Mason RP (2010) S-Gal, a novel <sup>1</sup>H MRI reporter for beta-galactosidase. *Magn Reson Med* 64(1):65–71.
- Walter G, Barton ER, Sweeney HL (2000) Noninvasive measurement of gene expression in skeletal muscle. *Proc Natl Acad Sci USA* 97(10):5151–5155.
- Cohen B, Dafni H, Meir G, Harmelin A, Neeman M (2005) Ferritin as an endogenous MRI reporter for noninvasive imaging of gene expression in C6 glioma tumors. *Neoplasia* 7(2):109–117.
- Genove G, DeMarco U, Xu H, Goinis WF, Ahrens ET (2005) A new transgene reporter for in vivo magnetic resonance imaging. *Nat Med* 11(4):450–454.
- Deans AE, et al. (2006) Cellular MRI contrast via coexpression of transferrin receptor and ferritin. *Magn Reson Med* 56(1):51–59.
- Tannous BA, et al. (2006) Metabolic biotinylation of cell surface receptors for in vivo imaging. *Nat Methods* 3(5):391–396.
- Ki S, et al. (2006) A novel magnetic resonance-based method to measure gene expression in living cells. *Nucleic Acids Res* 34(6):e51.
- Gilad AA, et al. (2007) Artificial reporter gene providing MRI contrast based on proton exchange. *Nat Biotechnol* 25(2):217–219.
- Zurkija O, Chan AW, Hu X (2008) MagA is sufficient for producing magnetic nanoparticles in mammalian cells, making it an MRI reporter. *Magn Reson Med* 59(6):1225–1231.
- Jamin Y, et al. (2009) Hyperpolarized <sup>13</sup>C magnetic resonance detection of carboxypeptidase G2 activity. *Magn Reson Med* 62(5):1300–1304.
- Chen AP, Hurd RE, Gu YP, Wilson DM, Cunningham CH (2011) <sup>13</sup>C MR reporter: probe system using dynamic nuclear polarization. *NMR Biomed* 24(5):514–520.
- Niers JM, et al. (2012) Single reporter for targeted multimodal in vivo imaging. *J Am Chem Soc* 134(11):5149–5156.
- Bartelle BB, Szulc KU, Suero-Abreu GA, Rodriguez JJ, Turnbull DH (2013) Divalent metal transporter, DMT1: A novel MRI reporter protein. *Magn Reson Med* 70(3):842–850.
- Bar-Shir A, et al. (2013) Transforming thymidine into a magnetic resonance imaging probe for monitoring gene expression. *J Am Chem Soc* 135(4):1617–1624.
